# Supplementary material for: Patient-Clinician Agreement on Treatment Type and Helpfulness: Results From a WTC Rescue and Recovery Worker Cohort
Source: Atypon-hosted journal article supplement (doi:10.1176/appi.ps.201200402), 2013-11-01
Supplement: 1173_ds001.pdf [file 1173_ds001.pdf]

**Table 2 Patient and clinician ratings regarding helpfulness of treatment**

| <b>Treatment Domain</b>                      | <b>N</b> | <b>Clinician Mean Score</b> | <b>SD</b> | <b>Patient Mean Score</b> | <b>SD</b> | <b>p</b> | <b>Correlation Coefficient</b> | <b>95% CI</b> |
|----------------------------------------------|----------|-----------------------------|-----------|---------------------------|-----------|----------|--------------------------------|---------------|
| Family Relationships                         | 137      | 1.8                         | .6        | 1.5                       | .7        | <.001    | .193                           | .059 - .328   |
| Finding/Keeping a Job                        | 50       | 2.3                         | .7        | 2.0                       | 1         | .004     | .209                           | -.008 – .426  |
| Feeling Better About Your Job                | 43       | 2.0                         | .6        | 2.0                       | .9        | .190     | .015                           | -.280 – .310  |
| Gaining a Positive Outlook Toward the Future | 151      | 1.8                         | .6        | 1.7                       | .8        | .018     | .209                           | .096 – .323   |
| Feeling Better About Yourself                | 154      | 1.8                         | .6        | 1.6                       | .7        | .026     | .120                           | -.001 – .240  |
| Reducing Symptoms                            | 153      | 1.8                         | .6        | 1.6                       | .8        | .013     | .188                           | .064 – .312   |

*Scores ranged from 1 to 4, with lower scores indicated more helpful ratings of treatment*
